# Supplementary material for: Touch Imprint Intraoperative Flow Cytometry as a Complementary Tool for Detailed Assessment of Resection Margins and Tumor Biology in Liver Surgery for Primary and Metastatic Liver Neoplasms
Source: MDPI journal article supplement (doi:10.3390/mps4030066), 2021-09-15
Supplement: s1 [file s1]

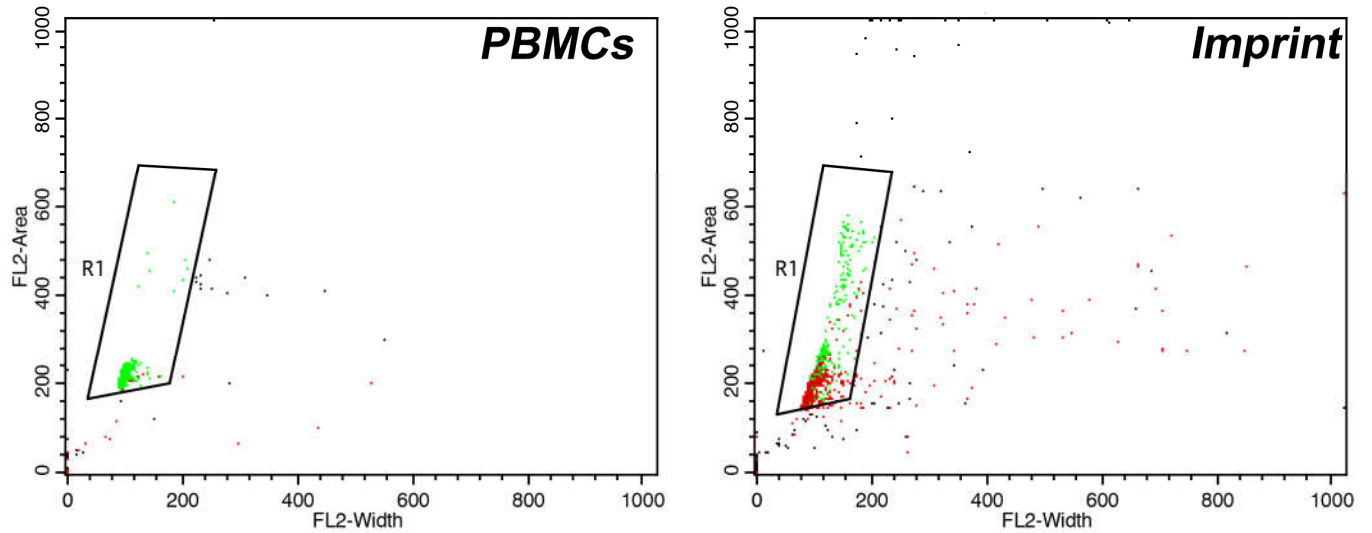

**Supplementary Figure S1:** Gating strategy to exclude cellular debris and doublets. Gating is done on a dot-plot based on Propidium iodide (FL2) fluorescence pulse area (Y-axis) and width (X-axis). Gate R2 corresponds on proliferating cells, excluding debris (lower left part of dot-plot) and doublets (right part of the histogram). Two representative dot-plots from PBMCs and imprint are presented.
